# Supplementary material
Source: MDPI journal article supplement (https://www.mdpi.com/2072-4292/13/13/2545)
Supplement: s1 [file s1]

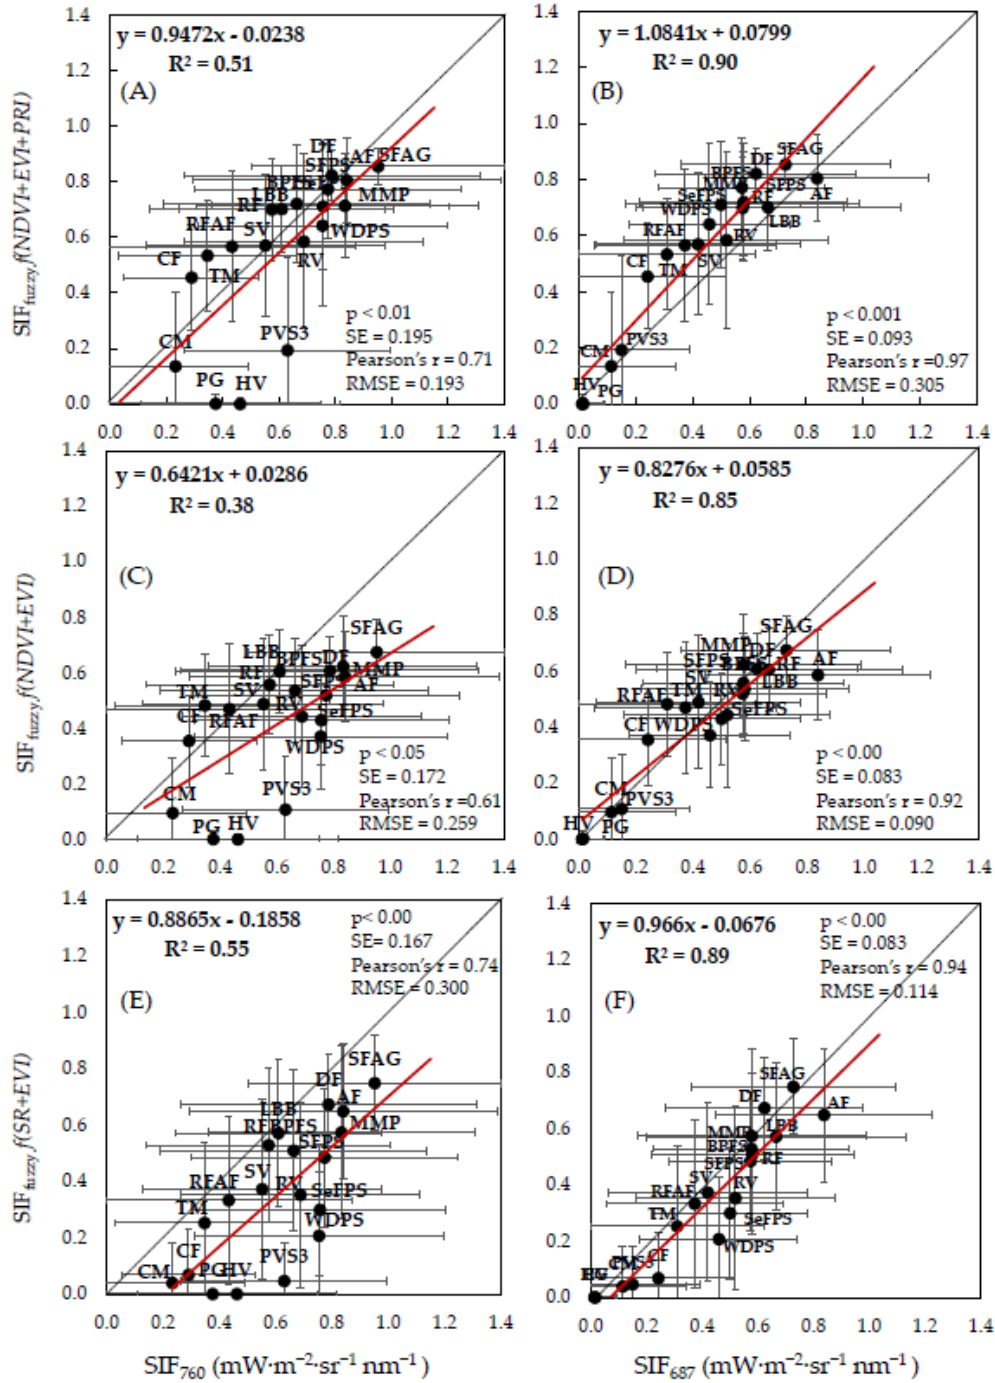

**Figure S2.** Scatterplots of fuzzy model outputs ( $SIF_{fuzzy}$ ) and original SIFs ( $SIF_{760}$  and  $SIF_{687}$ ) were determined based on *HyPlant* airborne data. A & B –  $SIF_{fuzzy}$  expressed by  $f(NDVI+EVI+PRI)$  under model C5; C & D -  $SIF_{fuzzy}$  expressed by  $f(NDVI+EVI)$  under model C1; E & F -  $SIF_{fuzzy}$  expressed by  $f(SR+EVI)$  under model C2. Standard deviations are represented in error bars. The letter abbreviations correspond to the codes of vegetation groups presented in Figure S2.
