# Supplementary material
Source: MDPI journal article supplement (https://www.mdpi.com/2072-4292/13/13/2545)
Supplement: s1 [file s1]

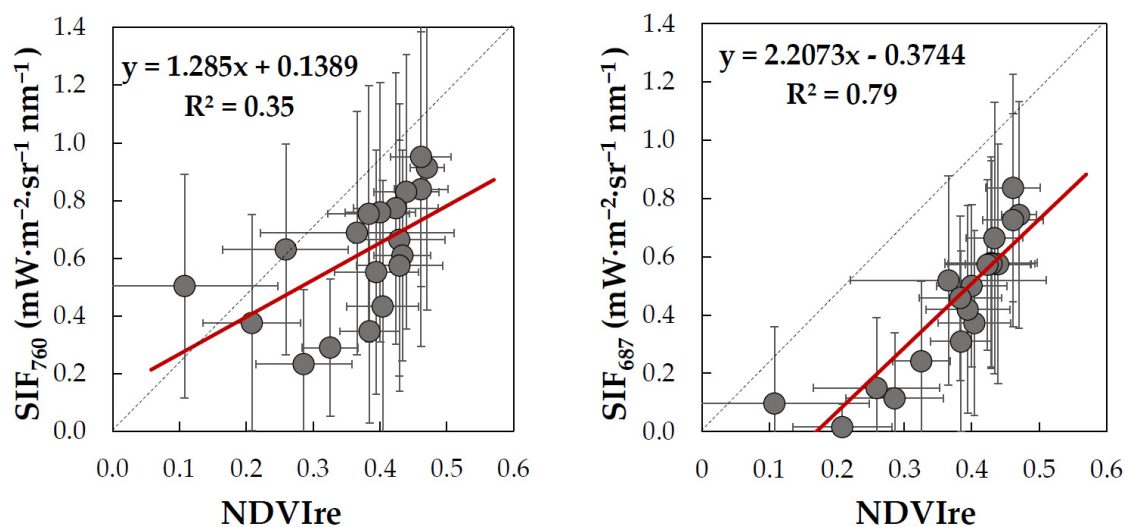

**Figure S1.** Correlation between NDVIre and SIF at 760 nm and 687 nm at the vegetation group levels for forest, grassland and peatland ecosystems, as identified in Bandopadhyay et al. 2019. Data based on the SWAMP airborne campaign held on the 15<sup>th</sup> of July 2015, Poland.
