# Supplementary material
Source: MDPI journal article supplement (https://www.mdpi.com/2072-4292/13/13/2545)
Supplement: s1 [file s1]

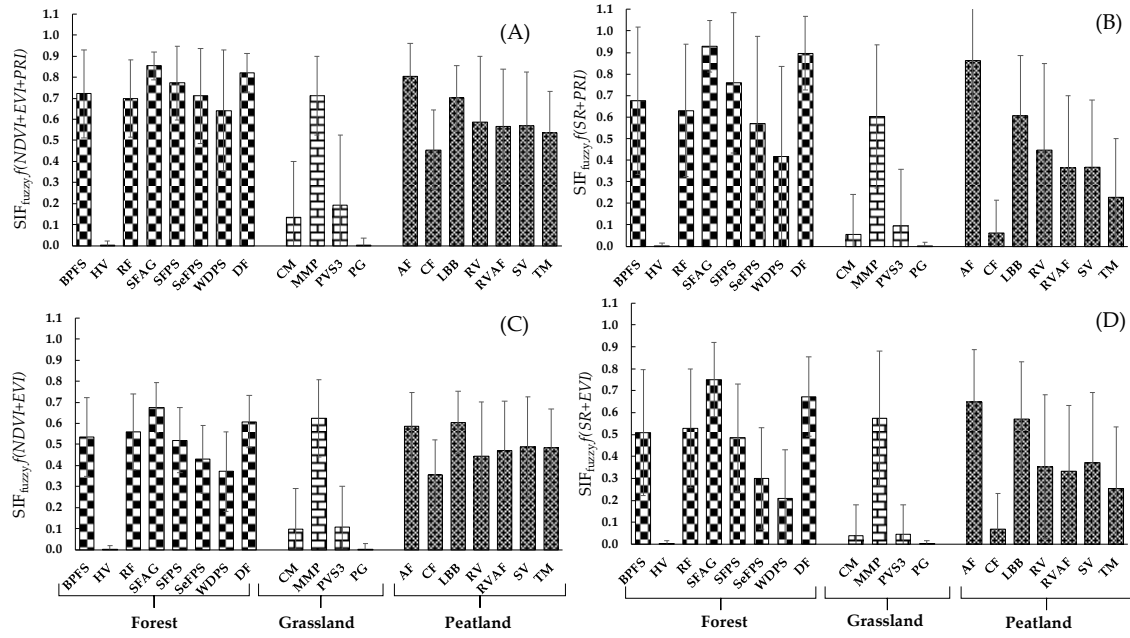

**Figure S3.** Bar diagrams represent the SIF<sub>fuzzy</sub> values obtained from 19 ROIs. A) SIF<sub>fuzzy</sub> expressed by  $f(NDVI+EVI+PRI)$  under C5; B) SIF<sub>fuzzy</sub> expressed by  $f(SR+PRI)$  under C4; C) SIF<sub>fuzzy</sub> expressed by  $f(NDVI+EVI)$  under C1; D) SIF<sub>fuzzy</sub> expressed by  $f(SR+EVI)$  under C2. Error bars represent the standard deviations.
